# Supplementary material for: Structure-based design and synthesis of a novel long-chain 4′′-alkyl ether derivative of EGCG as potent EGFR inhibitor: in vitro and in silico studies
Source: Royal Society of Chemistry journal article supplement (doi:10.1039/d2ra01919a), 2022-01-01

## *Uncropped Western blot data*

### **Structure-based design and synthesis of a novel long-chain 4''-alkyl ether derivative of EGCG as potent EGFR inhibitor: *In-vitro* and *in-silico* studies**

Satyam Singh<sup>1</sup>, Revathy Sahadevan<sup>2</sup>, Rajarshi Roy<sup>1</sup>, Mainak Biswas<sup>3</sup>, Priya Ghosh<sup>1</sup>, Parimal Kar<sup>1</sup>, Avinash Sonawane<sup>1</sup>, Sushabhan Sadhukhan<sup>2,4,5\*</sup>

<sup>1</sup>Department of Biosciences and Biomedical Engineering, Indian Institute of Technology Indore, Madhya Pradesh 453 552, India.

<sup>2</sup>Discipline of Chemistry, Indian Institute of Technology Palakkad, Kerala 678 623, India.

<sup>3</sup>School of Biotechnology, KIIT Deemed to be University, Bhubaneswar, Orissa 751 024, India.

<sup>4</sup>Physical & Chemical Biology Laboratory, Indian Institute of Technology Palakkad, Kerala 678 623, India.

<sup>5</sup>Department of Biological Sciences & Engineering, Indian Institute of Technology Palakkad, Kerala 678 623, India.

\*Corresponding author. *E-mail address*: [sushabhan@iitpkd.ac.in](mailto:sushabhan@iitpkd.ac.in)



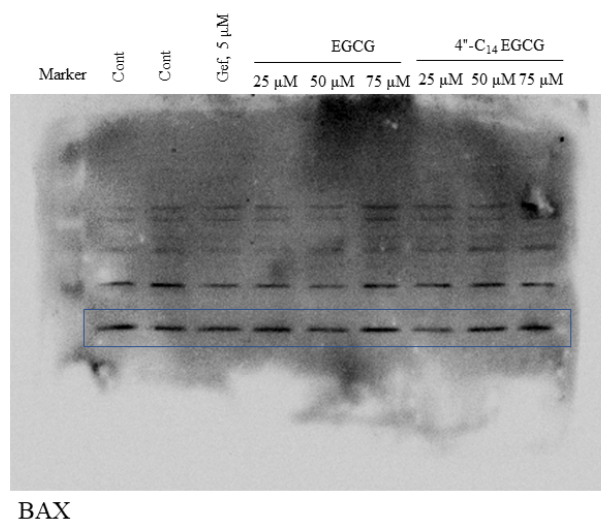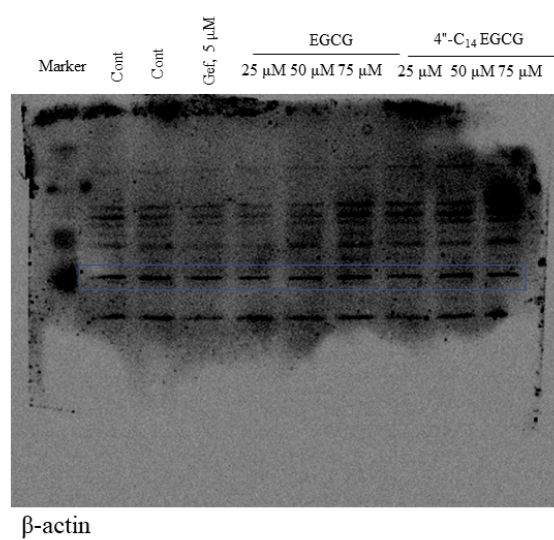

**Fig. 7.**

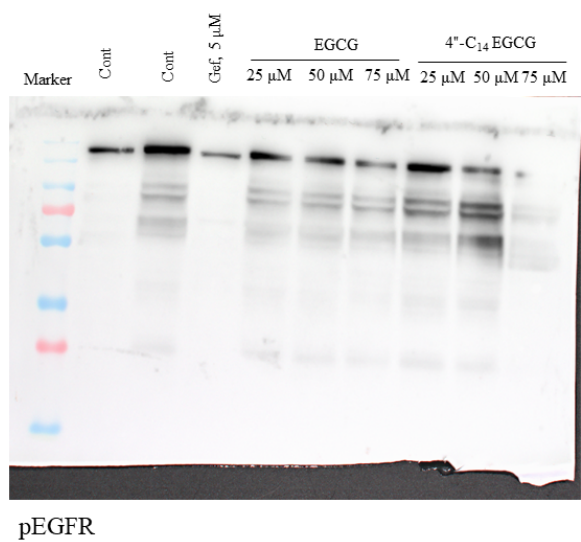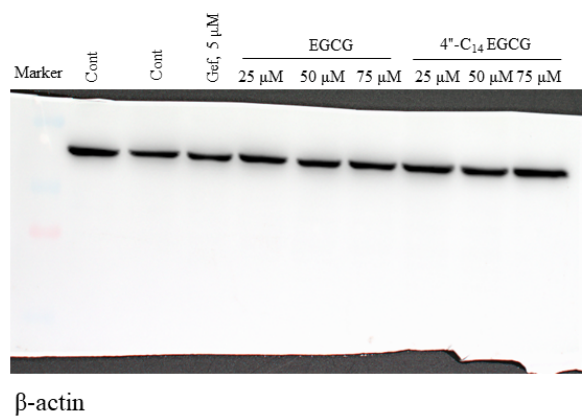

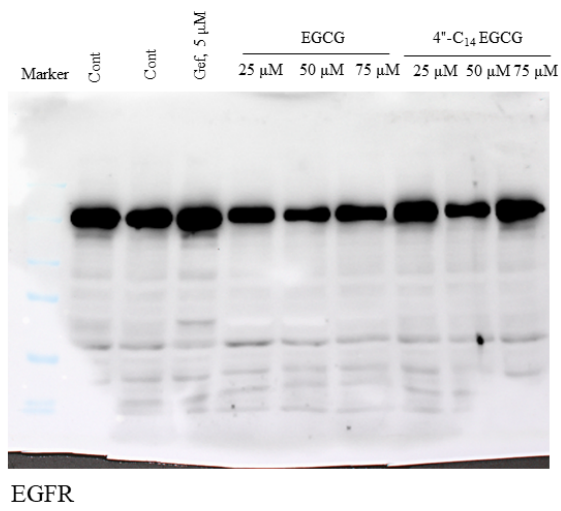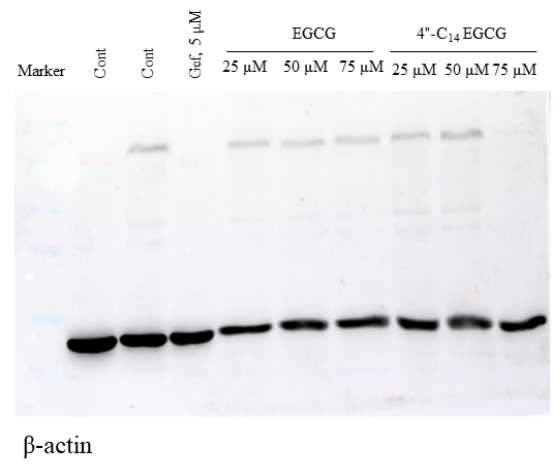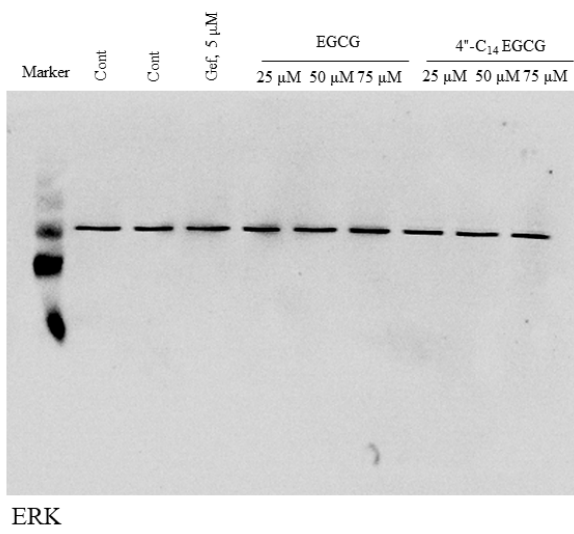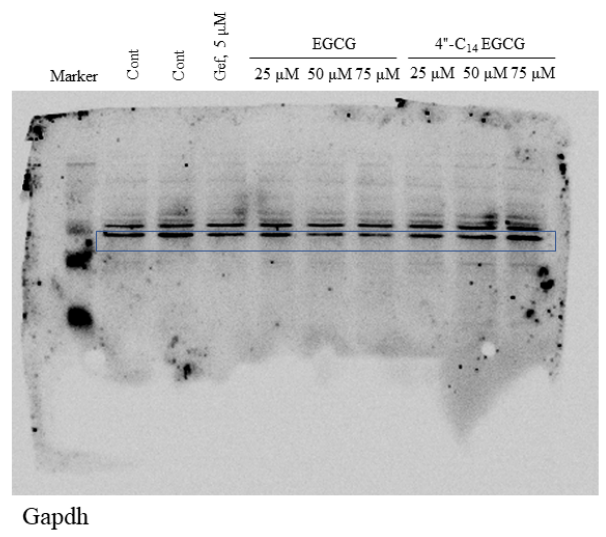

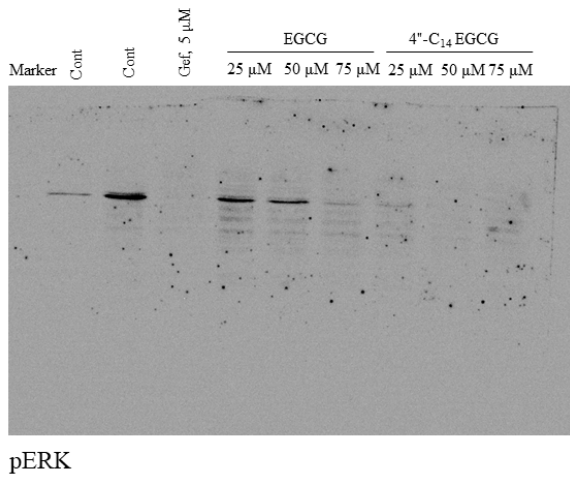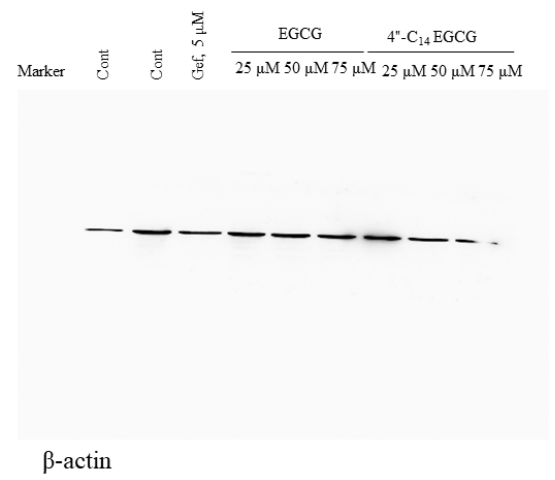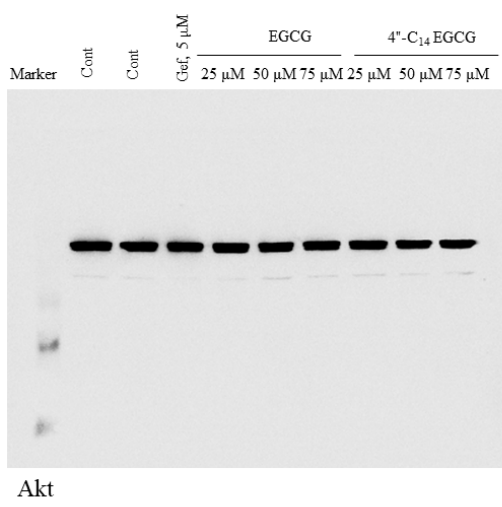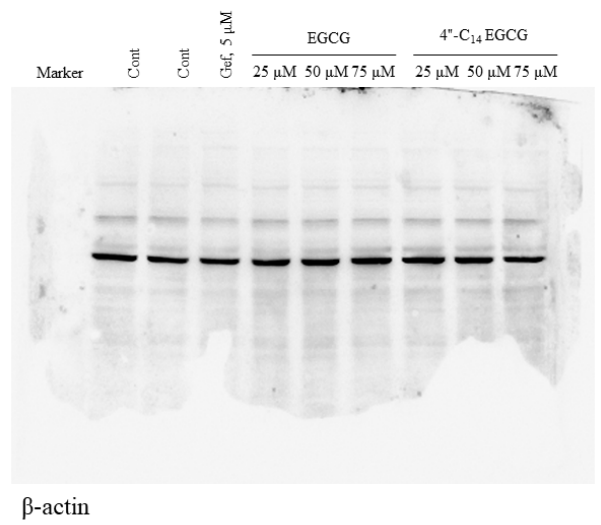

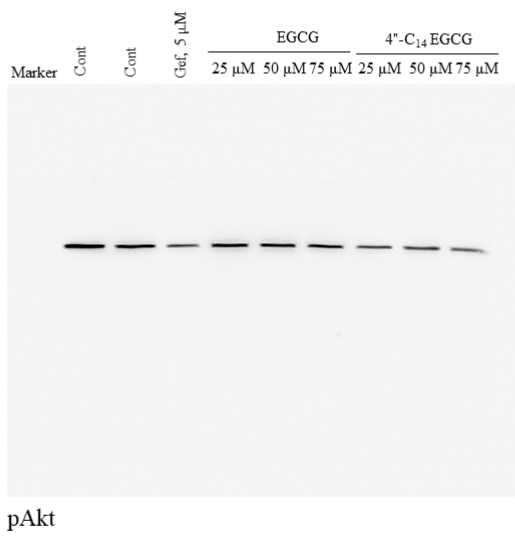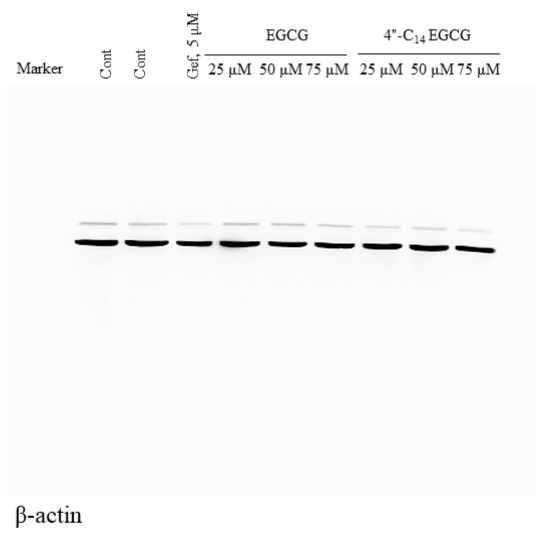

Supplement: d2ra01919a2.pdf [file d2ra01919a2.pdf]
